# Supplementary material for: Selective inhibition of HDAC8 decreases neuroblastoma growth in vitro and in vivo and enhances retinoic acid-mediated differentiation
Source: PubMed Central journal article supplement (PMC4669789; doi:10.1038/cddis.2015.24), 2015-02-19

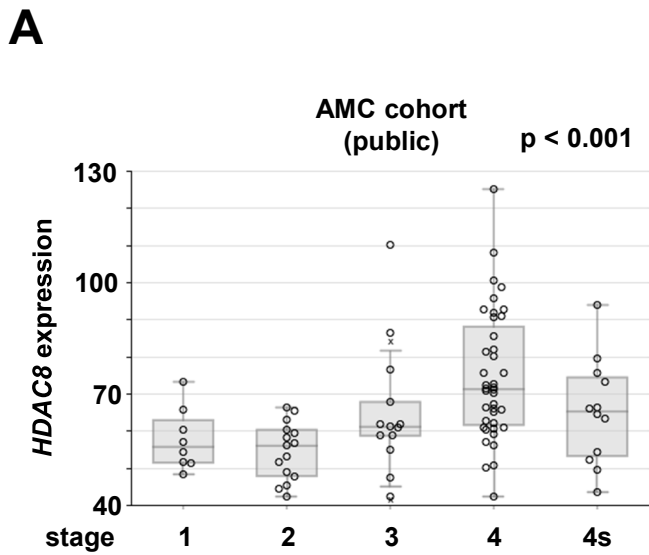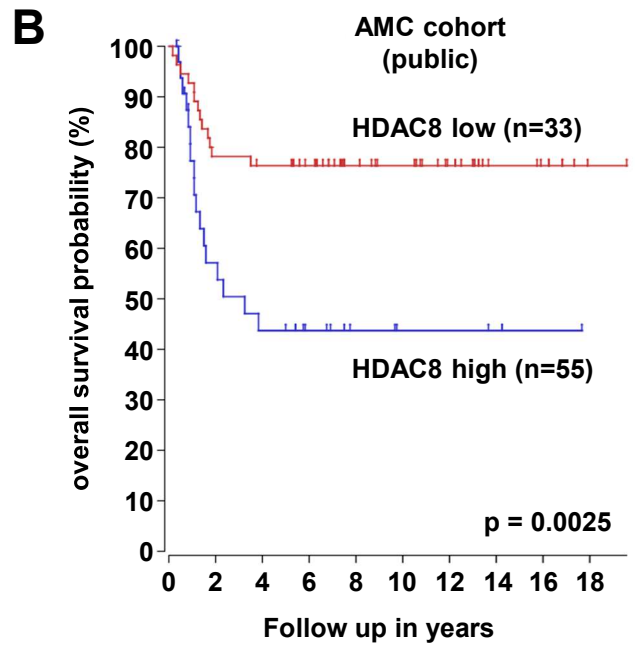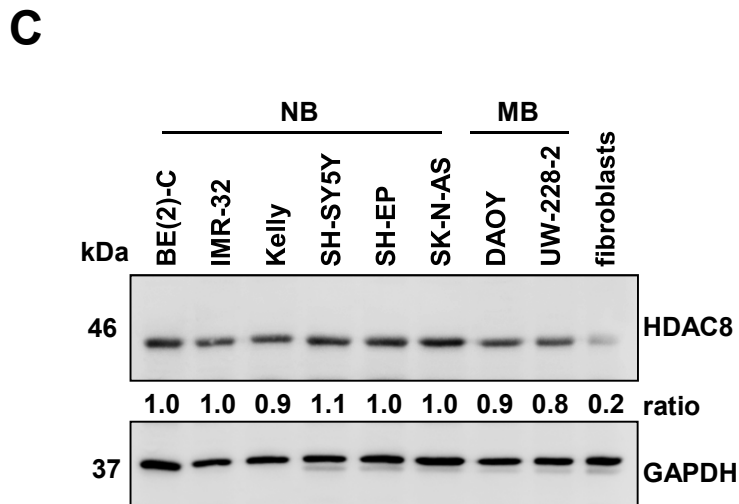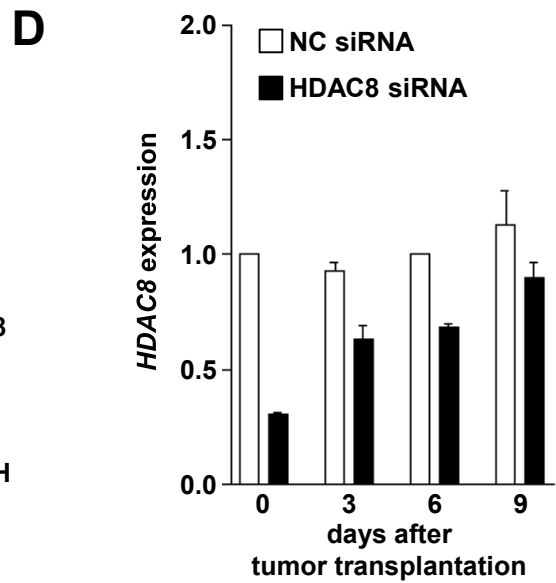

Supplement: cddis201524x4.pdf [file cddis201524x4.pdf]
